# Supplementary material
Source: Springer Nature journal article supplement (https://www.springermedizin.de/resource/supplementary/13054_2011_9600_MOESM3_ESM.pdf/9706536)

A

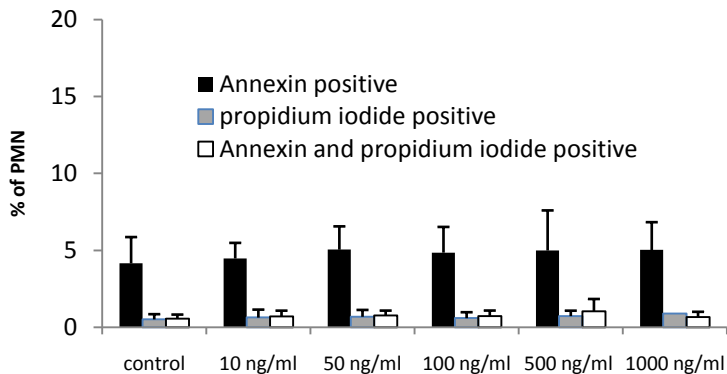

B

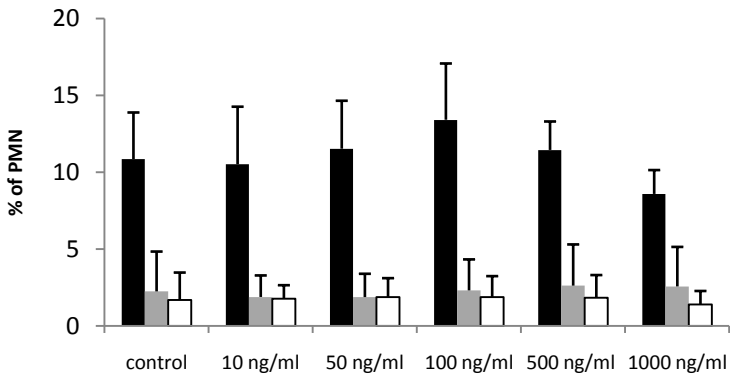

Supplement: MOESM3 [file 9706536]
